# Supplementary material for: Utilisation of health management information and its determinant factors among health professionals working at public health facilities in North Wollo Zone, Northeast Ethiopia: a cross-sectional study
Source: HighWire-hosted journal article supplement (doi:10.1136/bmjopen-2021-052479), 2022-04-01
Supplement: bmjopen-2021-052479supp001_data_supplement.pdf [file bmjopen-2021-052479supp001_data_supplement.pdf]

Code \_\_\_\_\_ (filled by data collector)

## Tools used to assess Determinant of health management information Utilization

### Part One: Socio Demographic Factors

| Please, encircle or fill your appropriate opinions for each question |                                                                      |                                                                                                                                                               |
|----------------------------------------------------------------------|----------------------------------------------------------------------|---------------------------------------------------------------------------------------------------------------------------------------------------------------|
| No.                                                                  | Questions                                                            | Responses                                                                                                                                                     |
| 101                                                                  | Type of health facility                                              | A. Hospitals B. Health center                                                                                                                                 |
| 102                                                                  | Residence                                                            | A. Urban B. Rural                                                                                                                                             |
| 103                                                                  | Gender                                                               | A. Male B. Female                                                                                                                                             |
| 104                                                                  | Age in years                                                         | _____                                                                                                                                                         |
| 105                                                                  | Educational level                                                    | A)Diploma B) Bsc degree<br>C) Master D) Other specify_____                                                                                                    |
| 106                                                                  | specialized field of study                                           | A)Nurse B)Medicine<br>C)Midwifery D)Pharmacy<br>E)Health officer F)Laboratory<br>G)Other(Specify)_____                                                        |
| 107                                                                  | Working experience in years                                          | _____                                                                                                                                                         |
| 108                                                                  | Unit/department you are working now                                  | A. IPD<br>B. OPD<br>C. ANC<br>D. Laboratory<br>A. Other(Specify)_____                                                                                         |
| 109                                                                  | Your position in the department                                      | A. Facility manager B. Department head<br>B. Performance monitoring team member<br>C. Coordinator D. Health professional only<br>E. Other role (specify)_____ |
| 110                                                                  | Monthly salary                                                       | _____                                                                                                                                                         |
| 111                                                                  | How many patients or clients do you treat/serve per a day on average | _____                                                                                                                                                         |
| 112                                                                  | How many hours do you work per a day on average                      | _____                                                                                                                                                         |
| <b>Section Two : Health Management information use</b>               |                                                                      |                                                                                                                                                               |

Code \_\_\_\_\_ (filled by data collector)

|                                                                                                                                                                                                                                                                        |   |   |   |   |   |
|------------------------------------------------------------------------------------------------------------------------------------------------------------------------------------------------------------------------------------------------------------------------|---|---|---|---|---|
| Please rate your level of agreement on the following statements regarding the <b>Health Management information use</b> . The statements are expressed using the Likert scale; 1- Strongly Disagree, 2 Disagree, 3-Neither Agree or Disagree, 4-Agree 5-Strongly agree. |   |   |   |   |   |
| <b>Part Two: Routine health information used for :</b>                                                                                                                                                                                                                 |   |   |   |   |   |
| 201. Treating patient                                                                                                                                                                                                                                                  | 1 | 2 | 3 | 4 | 5 |
| 202. Disease prioritization                                                                                                                                                                                                                                            | 1 | 2 | 3 | 4 | 5 |
| 203. Drug procurement                                                                                                                                                                                                                                                  | 1 | 2 | 3 | 4 | 5 |
| 204. Monitoring day to day health service activities                                                                                                                                                                                                                   | 1 | 2 | 3 | 4 | 5 |
| 205. Checking data quality                                                                                                                                                                                                                                             | 1 | 2 | 3 | 4 | 5 |
| 206. Resource allocation                                                                                                                                                                                                                                               | 1 | 2 | 3 | 4 | 5 |
| 207. Departments performance evaluation                                                                                                                                                                                                                                | 1 | 2 | 3 | 4 | 5 |
| 208. Planning                                                                                                                                                                                                                                                          | 1 | 2 | 3 | 4 | 5 |
| 209. Monitoring the performance of staffs                                                                                                                                                                                                                              | 1 | 2 | 3 | 4 | 5 |
| 2010. Selecting good experience with in the facility                                                                                                                                                                                                                   | 1 | 2 | 3 | 4 | 5 |
| 2011. Sharing of best experience for other facility and stakeholders                                                                                                                                                                                                   | 1 | 2 | 3 | 4 | 5 |
| 2012. Decision making                                                                                                                                                                                                                                                  | 1 | 2 | 3 | 4 | 5 |
| 2013. Community mobilization and discussion                                                                                                                                                                                                                            | 1 | 2 | 3 | 4 | 5 |

**Part Three: Behavioral Factors; This is to measure your knowledge on health management information system; please, encircle your appropriate opinions for each questions**

|     |                                                                                                                                                                                                          |                              |
|-----|----------------------------------------------------------------------------------------------------------------------------------------------------------------------------------------------------------|------------------------------|
| 301 | <b>Indicate possible reasons for collecting or using aggregated data on a monthly basis for the following data types. If it is reason encircle <u>YES</u>, if it is not a reason encircle <u>NO</u>.</b> |                              |
|     | Which are the reasons for collecting or using aggregated diseases data:                                                                                                                                  | Responses(encircle)          |
|     | a. To provide individual level care                                                                                                                                                                      | A. Yes B. No C. I don't know |
|     | b. To know changes in magnitude/burden of selected diseases                                                                                                                                              | A. Yes B. No C. I don't know |
|     | c. To triage patients who need urgent care and those who can wait for some time                                                                                                                          | A. Yes B. No C. I don't know |
|     | d. To identify disease outbreaks and take action to address epidemics                                                                                                                                    | A. Yes B. No C. I don't know |

Code \_\_\_\_\_ (filled by data collector)

|     |                                                                                                                                                                                                                                                |                              |
|-----|------------------------------------------------------------------------------------------------------------------------------------------------------------------------------------------------------------------------------------------------|------------------------------|
|     | e. To plan preventive and primitive activities                                                                                                                                                                                                 | A. Yes B. No C. I don't know |
| 302 | <b>Which can be the reasons for collecting or using aggregated immunization data:</b><br><b>(If it can be the reason encircle <u>Yes</u> in front of it; if it can't be encircle <u>No</u>)</b>                                                |                              |
|     | a. To know the coverage of effective intervention (immunization) for improving maternal or child health                                                                                                                                        | A. Yes B. No C. I don't know |
|     | b. To improve diagnosis and treatment of under five children                                                                                                                                                                                   | A. Yes B. No C. I don't know |
|     | c. To take action for providing necessary resources (eg. staffing, equipment, vaccines, etc)                                                                                                                                                   | A. Yes B. No C. I don't know |
|     | d. To plan for immunization activities – developing targets for immunization                                                                                                                                                                   | A. Yes B. No C. I don't know |
| 303 | <b>The reasons for collecting or using aggregated age/sex of patients/clients (If it can be the reason encircle <u>Yes</u> in front of it; if it can't be the reason encircle <u>No</u>)</b>                                                   |                              |
|     | a. To ensure equitable service coverage across people of all groups                                                                                                                                                                            | A. Yes B. No C. I don't know |
|     | b. To know which group is affected by certain disease                                                                                                                                                                                          | A. Yes B. No C. I don't know |
|     | c. To get more funding                                                                                                                                                                                                                         | A. Yes B. No C. I don't know |
|     | d. To calculate workload of OPD and under-five clinic                                                                                                                                                                                          | A. Yes B. No C. I don't know |
|     | e. To know if the appropriate group is getting the relevant services                                                                                                                                                                           | A. Yes B. No C. I don't know |
| 304 | <b>Which can be the reasons for collecting or using geographical data or residence of patients for example where they come from (If it can be the reason encircle <u>Yes</u> in front of it; if it can't be the reason encircle <u>No</u>)</b> |                              |
|     | a. To plan preventive and promotive activities targeted to certain geographic areas                                                                                                                                                            | A. Yes B. No C. I don't know |
|     | b. To improve access and utilization of health services                                                                                                                                                                                        | A. Yes B. No C. I don't know |
|     | c. To determine the behavior of clients/population group                                                                                                                                                                                       | A. Yes B. No C. I don't know |
|     | d. For disease surveillance (to control epidemic/disease outbreaks)                                                                                                                                                                            | A. Yes B. No C. I don't know |
| 305 | <b>Why population data are needed (example total number of people living in the catchment area)?(If it can be answer encircle <u>Yes</u> in front of it otherwise encircle <u>No</u>)</b>                                                      |                              |
|     | a. To use as denominator for calculating of indicators                                                                                                                                                                                         | A. Yes B. No C. I don't know |

Code \_\_\_\_\_ (filled by data collector)

|                                                                                                                                                                                                                                                |                                                            |                                                    |   |   |   |   |   |
|------------------------------------------------------------------------------------------------------------------------------------------------------------------------------------------------------------------------------------------------|------------------------------------------------------------|----------------------------------------------------|---|---|---|---|---|
|                                                                                                                                                                                                                                                | b. To plan the provision of various health services        | A. Yes B. No C. I don't know                       |   |   |   |   |   |
|                                                                                                                                                                                                                                                | c. To calculate the workload of health facilities          | A. Yes B. No C. I don't know                       |   |   |   |   |   |
|                                                                                                                                                                                                                                                | d. To know the knowledge and skill of health professionals | A. Yes B. No C. I don't know                       |   |   |   |   |   |
| 306                                                                                                                                                                                                                                            | How can we know data are consistent?                       | A. Yes B. No C. I don't know                       |   |   |   |   |   |
|                                                                                                                                                                                                                                                | A. if it is submitted by all(most) reporting facilities    | A. Yes B. No C. I don't know                       |   |   |   |   |   |
|                                                                                                                                                                                                                                                | B. .if there is no mathematical errors                     | A. Yes B. No C. I don't know                       |   |   |   |   |   |
|                                                                                                                                                                                                                                                | C. if the data are within the normal ranges                | A. Yes B. No C. I don't know                       |   |   |   |   |   |
| 307                                                                                                                                                                                                                                            | What does complete data mean?                              | A. Yes B. No C. I don't know                       |   |   |   |   |   |
|                                                                                                                                                                                                                                                | A. if it is submitted by all(most) reporting facilities    | A. Yes B. No C. I don't know                       |   |   |   |   |   |
|                                                                                                                                                                                                                                                | B. .if there is no mathematical errors                     | A. Yes B. No C. I don't know                       |   |   |   |   |   |
|                                                                                                                                                                                                                                                | C. if the data are within the normal ranges                | A. Yes B. No C. I don't know                       |   |   |   |   |   |
| 308                                                                                                                                                                                                                                            | When we say data are Accurate?                             |                                                    |   |   |   |   |   |
|                                                                                                                                                                                                                                                | A. if it is submitted by all(most) reporting facilities    | A. Yes B. No C. I don't know                       |   |   |   |   |   |
|                                                                                                                                                                                                                                                | B. .if there is no mathematical errors                     | A. Yes B. No C. I don't know                       |   |   |   |   |   |
|                                                                                                                                                                                                                                                | C. if the data are within the normal ranges                | A. Yes B. No C. I don't know                       |   |   |   |   |   |
| <b>3. 2. Please rate your perceived self-efficacy to HMIS activities in your health facility (circle the appropriate answer for strongly disagree=1, for disagree =2, for neutral =3, for agree=4, for strongly agree=5(high confidence) )</b> |                                                            |                                                    |   |   |   |   |   |
| 309                                                                                                                                                                                                                                            | Perceived self-efficacy in analyzing data                  | I can calculate percentage/rate correctly          | 1 | 2 | 3 | 4 | 5 |
| 310                                                                                                                                                                                                                                            |                                                            | I can compute data by months or year               | 1 | 2 | 3 | 4 | 5 |
| 311                                                                                                                                                                                                                                            | Perceived self-efficacy in interpreting data               | I can compute trend from bar chart                 | 1 | 2 | 3 | 4 | 5 |
| 312                                                                                                                                                                                                                                            |                                                            | I can compare data from bar chart                  | 1 | 2 | 3 | 4 | 5 |
| 313                                                                                                                                                                                                                                            | Perceived self-efficacy in using information               | I can use data for identifying gaps                | 1 | 2 | 3 | 4 | 5 |
| 314                                                                                                                                                                                                                                            |                                                            | can use data for planning future actions           | 1 | 2 | 3 | 4 | 5 |
| 315                                                                                                                                                                                                                                            |                                                            | I can use data for monitoring change in indicators | 1 | 2 | 3 | 4 | 5 |

Code \_\_\_\_\_ (filled by data collector)

|                                                                                                                                                                                                          |                                                                                                                             |                  |          |          |          |          |
|----------------------------------------------------------------------------------------------------------------------------------------------------------------------------------------------------------|-----------------------------------------------------------------------------------------------------------------------------|------------------|----------|----------|----------|----------|
| 316                                                                                                                                                                                                      | I can use data for advocacy                                                                                                 |                  |          |          |          |          |
| <b>3.3. Attitude: Please rate your attitude towards toward HMIS data</b> (circle your own opinion for strongly disagree=1, for disagree =2, for neutral =3, for agree=4, for strongly agree=5)           |                                                                                                                             |                  |          |          |          |          |
| <b>Question</b>                                                                                                                                                                                          |                                                                                                                             | <b>1</b>         | <b>2</b> | <b>3</b> | <b>4</b> | <b>5</b> |
| 317                                                                                                                                                                                                      | Are you Eager to undergo training on data management                                                                        | 1                | 2        | 3        | 4        | 5        |
| 318                                                                                                                                                                                                      | Are filling forms are easy and worthwhile exercise                                                                          | 1                | 2        | 3        | 4        | 5        |
| 319                                                                                                                                                                                                      | Are you interested in filling Forms                                                                                         | 1                | 2        | 3        | 4        | 5        |
| 320                                                                                                                                                                                                      | Collecting, analysis, reporting and utilizing data is not time consuming                                                    | 1                | 2        | 3        | 4        | 5        |
| 321                                                                                                                                                                                                      | Collecting, storing, analysis, reporting and utilizing data is useful exercise                                              | 1                | 2        | 3        | 4        | 5        |
| 322                                                                                                                                                                                                      | Collecting, analysis and reporting information which is not used for decision making encourages me                          | 1                | 2        | 3        | 4        | 5        |
| 323                                                                                                                                                                                                      | Collecting, analysis and reporting information gives me the feeling that data is needed for monitoring facility performance | 1                | 2        | 3        | 4        | 5        |
| 324                                                                                                                                                                                                      | Managing data is part of my duty/responsibility                                                                             | 1                | 2        | 3        | 4        | 5        |
| <b>.3.4 Motivation: Please rate your Motivation towards toward HMIS activities</b> (circle your own opinion for strongly disagree=1, for disagree =2, for neutral =3, for agree=4, for strongly agree=5) |                                                                                                                             |                  |          |          |          |          |
| S/N                                                                                                                                                                                                      | Questions                                                                                                                   | Possible answers |          |          |          |          |
| 325                                                                                                                                                                                                      | I always like to be guided by HMIS data to make decisions                                                                   | 1                | 2        | 3        | 4        | 5        |
| 326                                                                                                                                                                                                      | I put a great deal of effort into analyzing and interpreting HMIS data.                                                     | 1                | 2        | 3        | 4        | 5        |
| 327                                                                                                                                                                                                      | I am committed to monitor data collection in my department to make HMIS data better.                                        | 1                | 2        | 3        | 4        | 5        |
| 328                                                                                                                                                                                                      | I am dedicated to using HMIS data for decision making.                                                                      | 1                | 2        | 3        | 4        | 5        |
| 329                                                                                                                                                                                                      | I devote my time for the sake of using HMIS data for decision making.                                                       | 1                | 2        | 3        | 4        | 5        |
| 330                                                                                                                                                                                                      | I put a great deal of effort into understand the information needs of my facility (Department).                             | 1                | 2        | 3        | 4        | 5        |
| 331                                                                                                                                                                                                      | I am devoted to accessing HMIS data as needed for managing a program.                                                       | 1                | 2        | 3        | 4        | 5        |
| No                                                                                                                                                                                                       | <b>Part Four: Technical factors; please encircle Yes/No</b> for the following technical factors                             |                  |          |          |          |          |
| 401                                                                                                                                                                                                      | Is there standardized set of indicator in your facility?                                                                    | A. Yes B. No     |          |          |          |          |

Code \_\_\_\_\_ (filled by data collector)

|     |                                                                                                                    |                                                                                                         |
|-----|--------------------------------------------------------------------------------------------------------------------|---------------------------------------------------------------------------------------------------------|
| 402 | Is there friendly format for data collection and reporting                                                         | A. Yes B. No                                                                                            |
| 403 | If your answer is No for Question 402, what makes the formats to be unfriendly or difficult to understand for you? | A. Uncommon words/terms<br>B. abbreviations<br>C. formats are inconsistent<br>D. If other specify _____ |
| 404 | There is a use of appropriate technology for data analysis, transfer and presentation?                             | 1. Yes 2. No                                                                                            |

**5. Part Five: Organizational Factors: Please rate your facility management support** (circle the appropriate answer for strongly disagree=1, for disagree =2, for neutral =3, for agree=4, for strongly agree=5)

| Question about your facility/health department management               |                                                                                                                |   |   |   |   |   |
|-------------------------------------------------------------------------|----------------------------------------------------------------------------------------------------------------|---|---|---|---|---|
| 501                                                                     | My superior manager Use HMIS data for day to day management of the health center                               | 1 | 2 | 3 | 4 | 5 |
| 502                                                                     | My superior manager encourages to display data for monitoring their set target                                 | 1 | 2 | 3 | 4 | 5 |
| 503                                                                     | My superior manager encourages to gather data to find the root cause(s) of the problem                         | 1 | 2 | 3 | 4 | 5 |
| 504                                                                     | My superior manager encourages to develop appropriate criteria for selecting interventions for a given problem | 1 | 2 | 3 | 4 | 5 |
| 505                                                                     | My superior manager encourages to develop appropriate outcomes for a particular intervention                   | 1 | 2 | 3 | 4 | 5 |
| 506                                                                     | My superior manager encourages to evaluate whether the targets or outcomes have been achieved                  | 1 | 2 | 3 | 4 | 5 |
| <b>Organizational factors continue... culture of health information</b> |                                                                                                                |   |   |   |   |   |
| 507                                                                     | Health department encourages staff to use data to monitor changes in health service indicators                 | 1 | 2 | 3 | 4 | 5 |
| 508                                                                     | Health department encourages staff to use data monitor changes in health service indicators                    | 1 | 2 | 3 | 4 | 5 |
| 509                                                                     | Health department encourages staff to use data for developing future action plans                              | 1 | 2 | 3 | 4 | 5 |
| 510                                                                     | Health department encourages staff to use data for community actions                                           | 1 | 2 | 3 | 4 | 5 |
| 511                                                                     | Health department encourages staff/managers to check evidence before making decisions                          | 1 | 2 | 3 | 4 | 5 |
| 512                                                                     | Health department makes staff accountable for their decisions and actions                                      | 1 | 2 | 3 | 4 | 5 |
| 513                                                                     | Health department encourages supervisors to reward good work                                                   | 1 | 2 | 3 | 4 | 5 |
| 514                                                                     | Health department makes staff feel important by recognizing their work                                         | 1 | 2 | 3 | 4 | 5 |

Please, encircle or fill each question

Code \_\_\_\_\_ (filled by data collector)

515. Are reference materials available for data management in your department?  
A) Yes B) No C) Yes but not adequate
516. If your answer is yes for question 507, which type of reference materials are available (more than one answer is possible)  
A. Indicator reference sheet  
B. Data management guideline  
C. HMIS information user guideline  
D. HMIS diseases classification E. Other (specify) \_\_\_\_\_
517. Are report formats available in your department? A) Yes B) No C) Yes but not adequate
518. Is internet available in your department? A) Yes B) No
519. Are tally sheets available in your department  
A) Yes B) No C) Yes but not adequate
520. Does your facility provide pen, pencil or marker?  
A) Yes B) No C) Yes but not adequate
521. Are graph papers available in your department?  
A) Yes B) No C) Yes but not adequate
522. Are white papers available in your department?  
A) Yes B) No C) Yes but not adequate
523. Have you ever received a formal routine health information /health management information training before? A. Yes B. No
524. If you say yes in question No. 515, what type of training you took?  
A. Health statistics  
B. Data management(Data collection, storage, processing, analysis, quality checking, reporting and use)  
C. Monitoring and evaluation  
D. Other (specify) \_\_\_\_\_
525. Does your health facility have computer that can be used only for routine HMIS or data management task processing? A. Yes B. No
526. If your answer for question number 517 is “Yes”, do you think the computers are adequate? A. Yes B. No
527. For what purpose do you use the computers?(More than 1 answer is possible)  
A. To record or register patient visits D. To schedules or appoint patients  
B. For Administration and finance routines E. other(specify) \_\_\_\_\_  
C. To store and retrieve electronic patient information

Code \_\_\_\_\_ (filled by data collector)

528. In the past 3 months did you get supervision from higher officials?

- A. Yes B. No

529. If yes for the above question 520, how many times the unit/department supervised.

- A. Onetime B. Two times C. Three times

530. Did supervisor check the data management practices such as the way you are recording, analysis, reporting, data quality and utilization during supervision?

- A. Yes B. No

531. Did the supervisor discuss on data management activities based on HMIS information when he/she visited your facility? A. Yes B. No

532. Have you received feedback from higher levels A. Yes B. No

533. If your answer for question number 524 is yes, in what interval have you received feedback?

- A. Monthly B. Quarterly C. Every six month D. Annually

534. Are there any incentives for Data management process such as recording, processing, storage, data quality assurance, report and using?

- A. Yes B. No

535. If your answer for question number 526 is yes, what kind of incentives

- A. Training B. Money C. Recognition D. Other(specify) \_\_\_\_\_

**Observation Checklist**

|                                                                                                                    |        |    |
|--------------------------------------------------------------------------------------------------------------------|--------|----|
| Health Facility :                                                                                                  |        |    |
| Observer:                                                                                                          | Date : |    |
| Items                                                                                                              | YES    | NO |
| Presence of health facility RHIS targets displayed                                                                 |        |    |
| Presence of health facility indicator performance charts, graphs and table displayed                               |        |    |
| Presence of staff meeting minutes reflecting reports, data and feedback from health facility or district discussed |        |    |
| Presence of action work plan relating identified data gaps and how they were addressed                             |        |    |
| Presence of RHIS training manual and guide                                                                         |        |    |
| Presence of RHIS supervisory checklist                                                                             |        |    |
| presence of RHIS supervisory report                                                                                |        |    |
| presence of data quality assurance checklist                                                                       |        |    |
